# Supplementary material for: Lagged Associations of Metropolitan Statistical Area- and State-Level Income Inequality with Cognitive Function: The Health and Retirement Study
Source: PLoS One. 2016 Jun 22;11(6):e0157327. doi: 10.1371/journal.pone.0157327 (PMC4917220; doi:10.1371/journal.pone.0157327)
Supplement: S1 Table — (XLSX) [file pone.0157327.s001.xlsx]

## Sheet: MSA Data
S1 Table. 1990 Gini Coefficient and Income Inequality Quartiles for U.S. MSAs.
MSA Name	MSA Code	1990 Gini Coefficient	Income Inequality Quartile (1 = lowest, 4 = highest)
Abilene, TX	40	0.447328	4
Akron, OH	80	0.433166	3
Albany, GA	120	0.452292	4
Albany/Schenectady/Troy, NY	160	0.405053	1
Albuquerque, NM	200	0.435665	3
Alexandria, LA	220	0.472679	4
Allentown/Bethlehem/Easton, PA	240	0.402418	1
Altoona, PA	280	0.41902	2
Amarillo, TX	320	0.449849	4
Anaheim-Santa Ana, CA	360	0.415223	2
Anchorage, AK	380	0.393316	1
Anderson, IN	400	0.406023	1
Anderson, SC	405	0.418845	2
Ann Arbor, MI	440	0.427977	3
Anniston, AL	450	0.420361	2
Appleton/Oshkosh/Neenah, WI	460	0.377532	1
Asheville, NC	480	0.429607	3
Athens, GA	500	0.469669	4
Atlanta, GA	520	0.426981	3
Atlantic/Cape May, NJ	560	0.426749	3
Augusta/Aiken, GA/SC	600	0.43132	3
Aurora-Elgin, IL	620	0.381973	1
Austin/San Marcos, TX	640	0.452245	4
Bakersfield, CA	680	0.42986	3
Baltimore, MD	720	0.420647	2
Baton Rouge, LA	760	0.458772	4
Battle Creek, MI	780	0.411101	2
Beaumont/Port Arthur, TX	840	0.451178	4
Beaver County, PA	845	0.418971	2
Bellingham, WA	860	0.421898	2
Benton Harbor, MI	870	0.423272	2
Bergen/Passaic, NJ	875	0.446	4
Billings, MT	880	0.409212	2
Biloxi/Gulfport/Pascagoula, MS	920	0.436916	3
Binghamton, NY	960	0.402853	1
Birmingham, AL	1000	0.46358	4
Bismarck, ND	1010	0.400858	1
Bloomington, IN	1020	0.460597	4
Bloomington/Normal, IL	1040	0.411533	2
Boise City, ID	1080	0.411856	2
Boulder/Longmont, CO	1125	0.424596	2
Bradenton, FL	1140	0.421206	2
Brazoria, TX	1145	0.385129	1
Bremerton, WA	1150	0.388679	1
Brownsville/Harlingen/San Benito, TX	1240	0.49566	4
Bryan/College Station, TX	1260	0.514137	4
Buffalo/Niagara Falls, NY	1280	0.432495	3
Burlington, NC	1300	0.415275	2
Canton/Massillon, OH	1320	0.416567	2
Casper, WY	1350	0.417199	2
Cedar Rapids, IA	1360	0.403514	1
Champaign/Urbana, IL	1400	0.439418	3
Charleston/North Charleston, SC	1440	0.417537	2
Charleston, WV	1480	0.44365	3
Charlotte/Gastonia/Rock Hill, NC/SC	1520	0.419735	2
Charlottesville, VA	1540	0.444494	4
Chattanooga, TN/GA	1560	0.444797	4
Cheyenne, WY	1580	0.391663	1
Chicago, IL	1600	0.446486	4
Chico/Paradise, CA	1620	0.444422	4
Cincinnati, OH/KY/IN	1640	0.43931	3
Clarksville/Hopkinsville, TN/KY	1660	0.395367	1
Cleveland/Lorain/Elyria, OH	1680	0.445664	4
Colorado Springs, CO	1720	0.40031	1
Columbia, MO	1740	0.444614	4
Columbia, SC	1760	0.409687	2
Columbus, GA/AL	1800	0.454049	4
Columbus, OH	1840	0.419457	2
Corpus Christi, TX	1880	0.46267	4
Cumberland, MD/WV	1900	0.441403	3
Dallas, TX	1920	0.445943	4
Danville, VA	1950	0.431626	3
Davenport/Moline/Rock Island, IA/IL	1960	0.415548	2
Dayton/Springfield, OH	2000	0.414854	2
Daytona Beach, FL	2020	0.428014	3
Decatur, AL	2030	0.424108	2
Decatur, IL	2040	0.424554	2
Denver, CO	2080	0.419906	2
Des Moines, IA	2120	0.409605	2
Detroit, MI	2160	0.437628	3
Dothan, AL	2180	0.43853	3
Dubuque, IA	2200	0.408996	1
Duluth/Superior, MN/WI	2240	0.412854	2
Eau Claire, WI	2290	0.405212	1
El Paso, TX	2320	0.45193	4
Elkhart/Goshen, IN	2330	0.401442	1
Elmira, NY	2335	0.41324	2
Enid, OK	2340	0.418809	2
Erie, PA	2360	0.428287	3
Eugene/Springfield, OR	2400	0.429027	3
Evansville/Henderson, IN/KY	2440	0.429204	3
Fargo/Moorhead, ND/MN	2520	0.417283	2
Fayetteville, NC	2560	0.401337	1
Fayetteville/Springdale/Rogers, AR	2580	0.44707	4
Flint, MI	2640	0.422127	2
Florence, AL	2650	0.443698	3
Florence, SC	2655	0.462891	4
Fort Collins/Loveland, CO	2670	0.418212	2
Fort Lauderdale, FL	2680	0.447924	4
Fort Myers/Cape Coral, FL	2700	0.428798	3
Fort Pierce/Port St. Lucie, FL	2710	0.460228	4
Fort Smith, AR/OK	2720	0.443861	3
Fort Walton Beach, FL	2750	0.391434	1
Fort Wayne, IN	2760	0.39614	1
Fort Worth/Arlington, TX	2800	0.41519	2
Fresno, CA	2840	0.456799	4
Gadsden, AL	2880	0.444075	4
Gainesville, FL	2900	0.479605	4
Galveston/Texas City, TX	2920	0.447474	4
Gary, IN	2960	0.407278	1
Glens Falls, NY	2975	0.400999	1
Grand Forks, ND/MN	2985	0.40632	1
Grand Rapids/Muskegon/Holland, MI	3000	0.395875	1
Great Falls, MT	3040	0.432558	3
Greeley, CO	3060	0.411476	2
Green Bay, WI	3080	0.399007	1
Greensboro/Winston-Salem/High Point, NC	3120	0.431131	3
Greenville/Spartanburg/Anderson, SC	3160	0.421652	2
Hagerstown, MD	3180	0.391789	1
Hamilton/Middletown, OH	3200	0.403429	1
Harrisburg/Lebanon/Carlisle, PA	3240	0.388927	1
Hickory/Morganton/Lenoir, NC	3290	0.398008	1
Honolulu, HI	3320	0.409005	2
Houma, LA	3350	0.462736	4
Houston, TX	3360	0.46016	4
Huntington/Ashland, WV/KY/OH	3400	0.459875	4
Huntsville, AL	3440	0.414496	2
Indianapolis, IN	3480	0.418202	2
Iowa City, IA	3500	0.452831	4
Jackson, MI	3520	0.403073	1
Jackson, MS	3560	0.464386	4
Jackson, TN	3580	0.448205	4
Jacksonville, FL	3600	0.430234	3
Jacksonville, NC	3605	0.368786	1
Jamestown, NY	3610	0.412008	2
Janesville/Beloit, WI	3620	0.388484	1
Jersey City, NJ	3640	0.441042	3
Johnson City/Kingsport/Bristol, TN/VA	3660	0.442885	3
Johnstown, PA	3680	0.425846	3
Joliet, IL	3690	0.362182	1
Joplin, MO	3710	0.431454	3
Kalamazoo/Battle Creek, MI	3720	0.426569	3
Kankakee, IL	3740	0.408542	1
Kansas City, MO/KS	3760	0.417454	2
Kenosha, WI	3800	0.381047	1
Killeen/Temple, TX	3810	0.40367	1
Knoxville, TN	3840	0.453766	4
Kokomo, IN	3850	0.40554	1
La Crosse, WI/MN	3870	0.39767	1
Lafayette, LA	3880	0.477487	4
Lafayette, IN	3920	0.425304	2
Lake Charles, LA	3960	0.454982	4
Lake County, IL	3965	0.459643	4
Lakeland/Winter Haven, FL	3980	0.427324	3
Lancaster, PA	4000	0.383747	1
Lansing/East Lansing, MI	4040	0.404033	1
Laredo, TX	4080	0.500209	4
Las Cruces, NM	4100	0.440092	3
Las Vegas, NV/AZ	4120	0.426132	3
Lawrence, KS	4150	0.453321	4
Lawton, OK	4200	0.403877	1
Lexington, KY	4280	0.451439	4
Lima, OH	4320	0.393506	1
Lincoln, NE	4360	0.410356	2
Little Rock/North Little Rock, AR	4400	0.433029	3
Longview/Marshall, TX	4420	0.451297	4
Lorain-Elyria, OH	4440	0.38777	1
Los Angeles/Long Beach, CA	4480	0.471079	4
Louisville, KY/IN	4520	0.439245	3
Lubbock, TX	4600	0.471462	4
Lynchburg, VA	4640	0.426356	3
Macon, GA	4680	0.443201	3
Madison, WI	4720	0.403709	1
Mansfield, OH	4800	0.403427	1
McAllen/Edinburg/Mission, TX	4880	0.498925	4
Medford/Ashland, OR	4890	0.433023	3
Melbourne/Titusville/Palm Bay, FL	4900	0.40006	1
Memphis, TN/AR/MS	4920	0.463981	4
Merced, CA	4940	0.434857	3
Miami, FL	5000	0.496392	4
Middlesex/Somerset/Hunterdon, NJ	5015	0.383038	1
Midland, TX	5040	0.474017	4
Milwaukee/Waukesha, WI	5080	0.414263	2
Minneapolis/St. Paul, MN/WI	5120	0.404425	1
Mobile, AL	5160	0.462307	4
Modesto, CA	5170	0.427877	3
Monmouth/Ocean, NJ	5190	0.424688	2
Monroe, LA	5200	0.485785	4
Montgomery, AL	5240	0.440651	3
Muncie, IN	5280	0.45697	4
Muskegon, MI	5320	0.412705	2
Naples, FL	5345	0.502029	4
Nashville, TN	5360	0.436778	3
Nassau/Suffolk, NY	5380	0.412619	2
New Orleans, LA	5560	0.481098	4
New York, NY	5600	0.510725	4
Newark, NJ	5640	0.459443	4
Niagara Falls, NY	5700	0.395951	1
Norfolk/Virginia Beach/Newport News, VA/NC	5720	0.400231	1
Oakland, CA	5775	0.420426	2
Ocala, FL	5790	0.429635	3
Odessa/Midland, TX	5800	0.448947	4
Oklahoma City, OK	5880	0.438587	3
Olympia, WA	5910	0.379328	1
Omaha, NE/IA	5920	0.412505	2
Orange County, NY	5950	0.392393	1
Orlando, FL	5960	0.415824	2
Owensboro, KY	5990	0.434229	3
Oxnard-Ventura, CA	6000	0.394435	1
Panama City, FL	6015	0.435566	3
Parkersburg/Marietta, WV/OH	6020	0.417171	2
Pascagoula, MS	6025	0.426772	3
Pensacola, FL	6080	0.430557	3
Peoria/Pekin, IL	6120	0.416401	2
Philadelphia, PA/NJ	6160	0.439457	3
Phoenix/Mesa, AZ	6200	0.430941	3
Pine Bluff, AR	6240	0.462764	4
Pittsburgh, PA	6280	0.455633	4
Portland/Vancouver, OR/WA	6440	0.42266	2
Poughkeepsie, NY	6460	0.383857	1
Provo/Orem, UT	6520	0.404874	1
Pueblo, CO	6560	0.432308	3
Racine, WI	6600	0.392887	1
Raleigh/Durham/Chapel Hill, NC	6640	0.416638	2
Rapid City, SD	6660	0.414547	2
Reading, PA	6680	0.398713	1
Redding, CA	6690	0.425172	2
Reno, NV	6720	0.420701	2
Richland/Kennewick/Pasco, WA	6740	0.398455	1
Richmond/Petersburg, VA	6760	0.416286	2
Riverside/San Bernardino, CA	6780	0.418758	2
Roanoke, VA	6800	0.421107	2
Rochester, MN	6820	0.394016	1
Rochester, NY	6840	0.404654	1
Rockford, IL	6880	0.41267	2
Sacramento, CA	6920	0.415451	2
Saginaw/Bay City/Midland, MI	6960	0.429301	3
St. Cloud, MN	6980	0.393014	1
St. Joseph, MO	7000	0.427784	3
St. Louis, MO/IL	7040	0.426035	3
Salem, OR	7080	0.410523	2
Salinas, CA	7120	0.423488	2
Salt Lake City/Ogden, UT	7160	0.394164	1
San Angelo, TX	7200	0.438104	3
San Antonio, TX	7240	0.44948	4
San Diego, CA	7320	0.428226	3
San Francisco, CA	7360	0.462225	4
San Jose, CA	7400	0.399341	1
Santa Barbara/Santa Maria/Lompoc, CA	7480	0.453263	4
Santa Cruz/Watsonville, CA	7485	0.429481	3
Santa Fe, NM	7490	0.442242	3
Santa Rosa, CA	7500	0.409543	2
Sarasota/Bradenton, FL	7510	0.447497	4
Savannah, GA	7520	0.448004	4
Scranton/Wilkes-Barre/Hazleton, PA	7560	0.430242	3
Seattle/Bellevue/Everett, WA	7600	0.407855	1
Sharon, PA	7610	0.404206	1
Sheboygan, WI	7620	0.372335	1
Sherman/Denison, TX	7640	0.437975	3
Shreveport/Bossier City, LA	7680	0.47006	4
Sioux City, IA/NE	7720	0.429114	3
Sioux Falls, SD	7760	0.412537	2
South Bend, IN	7800	0.418379	2
Spokane, WA	7840	0.427802	3
Springfield, IL	7880	0.410416	2
Springfield, MO	7920	0.436093	3
State College, PA	8050	0.433684	3
Steubenville/Weirton, OH/WV	8080	0.424414	2
Stockton/Lodi, CA	8120	0.420933	2
Syracuse, NY	8160	0.409443	2
Tacoma, WA	8200	0.396862	1
Tallahassee, FL	8240	0.461965	4
Tampa/St. Petersburg/Clearwater, FL	8280	0.434996	3
Terre Haute, IN	8320	0.438476	3
Texarkana, TX/Texarkana, AR	8360	0.44781	4
Toledo, OH	8400	0.439722	3
Topeka, KS	8440	0.394219	1
Trenton, NJ	8480	0.434251	3
Tucson, AZ	8520	0.452692	4
Tulsa, OK	8560	0.447588	4
Tuscaloosa, AL	8600	0.477485	4
Tyler, TX	8640	0.459592	4
Utica/Rome, NY	8680	0.413836	2
Vallejo/Fairfield/Napa, CA	8720	0.37951	1
Vancouver, WA	8725	0.389148	1
Victoria, TX	8750	0.460273	4
Vineland/Millville/Bridgeton, NJ	8760	0.424075	2
Visalia/Tulare/Porterville, CA	8780	0.441973	3
Waco, TX	8800	0.465867	4
Washington, DC/MD/VA/WV	8840	0.398039	1
Waterloo/Cedar Falls, IA	8920	0.420006	2
Wausau, WI	8940	0.389711	1
West Palm Beach/Boca Raton, FL	8960	0.486799	4
Wheeling, WV/OH	9000	0.435449	3
Wichita, KS	9040	0.419977	2
Wichita Falls, TX	9080	0.441283	3
Williamsport, PA	9140	0.399246	1
Wilmington/Newark, DE/MD	9160	0.399531	1
Wilmington, NC	9200	0.443222	3
Yakima, WA	9260	0.439115	3
York, PA	9280	0.376822	1
Youngstown/Warren, OH	9320	0.428144	3
Yuba City, CA	9340	0.435923	3
Yuma, AZ	9360	0.422892	2
