# Supplementary material for: Lagged Associations of Metropolitan Statistical Area- and State-Level Income Inequality with Cognitive Function: The Health and Retirement Study
Source: PLoS One. 2016 Jun 22;11(6):e0157327. doi: 10.1371/journal.pone.0157327 (PMC4917220; doi:10.1371/journal.pone.0157327)
Supplement: S2 Table — (XLSX) [file pone.0157327.s002.xlsx]

## Sheet: State Data
S2 Table. 1990 Gini Coefficient and Income Inequality Quartiles for U.S. States and D.C.
State Name	1990 Gini Coefficient	Income Inequality Quartile (1 = lowest, 4 = highest)
Alabama	0.45885	4
Alaska	0.39938	1
Arizona	0.44088	3
Arkansas	0.45106	4
California	0.44507	3
Colorado	0.42625	2
Connecticut	0.44066	3
Delaware	0.40794	1
District of Columbia	0.50227	4
Florida	0.45316	4
Georgia	0.4482	4
Hawaii	0.41354	1
Idaho	0.42023	2
Illinois	0.44296	3
Indiana	0.41276	1
Iowa	0.41171	1
Kansas	0.42784	2
Kentucky	0.45862	4
Louisiana	0.48012	4
Maine	0.41023	1
Maryland	0.41339	1
Massachusetts	0.43282	3
Michigan	0.43214	3
Minnesota	0.4181	2
Mississippi	0.47408	4
Missouri	0.43964	3
Montana	0.42639	2
Nebraska	0.41761	2
Nevada	0.42192	2
New Hampshire	0.39041	1
New Jersey	0.43417	3
New Mexico	0.44703	4
New York	0.47272	4
North Carolina	0.43177	3
North Dakota	0.4163	2
Ohio	0.42839	3
Oklahoma	0.451	4
Oregon	0.42488	2
Pennsylvania	0.43865	3
Rhode Island	0.42456	2
South Carolina	0.4303	3
South Dakota	0.4226	2
Tennessee	0.45196	4
Texas	0.46137	4
Utah	0.39748	1
Vermont	0.39945	1
Virginia	0.42711	2
Washington	0.41577	2
West Virginia	0.45163	4
Wisconsin	0.40529	1
Wyoming	0.40977	1
